# Supplementary material for: Divergent Evolution of CHD3 Proteins Resulted in MOM1 Refining Epigenetic Control in Vascular Plants
Source: PLoS Genet. 2008 Aug 22;4(8):e1000165. doi: 10.1371/journal.pgen.1000165 (PMC2507757; doi:10.1371/journal.pgen.1000165)
Supplement: Figure S5 — Alignment of SNF2 domains from MOM1 homologues and other SNF2-containing proteins. The conserved helicase motifs are framed in red. Point mutations of conserved amino acids that are known to inactivate SNF2 domains of dMi-2 [18],[28], PKL [17] and SYD [29] are indicated above the alignment. Asterisks below the alignment indicate amino acids conserved in MOM1 homologues but absent from other SNF2-containing proteins. (0.04 MB PDF) [file pgen.1000165.s005.pdf]

*ss12-4* (G1546A)  
*dMi2-BL1* (G758S)  
*dMi2-5* (G737D)

|        |                                                                       |                       |                                   |                 |                                                                                                               |
|--------|-----------------------------------------------------------------------|-----------------------|-----------------------------------|-----------------|---------------------------------------------------------------------------------------------------------------|
| HsCHD3 | : P E F I T A T G G T L I M Y Q L E G L N M L R F S W A C T D T - I L | A D E M G L G K T I Q | T I V L Y S L Y K E G H T K G P F | L V S A I L S T | I I N W E E F Q M N A P K F V V V T Y T G K D S R A I R E N E F S F E I N A I G G A A - - - F N M E S A Q V   |
| dMi-2  | : E A L L G T G M Q L P Y Q I G I N W L Y S W G G I D T - I L         | A D M G L G K T I Q   | T V T L Y S L Y K G C H G P F     | L V A V L S T   | L V N W E E F L N A P D F C I T Y I G K Y S R A V I - - - N N L S F E R G A I G S - - - - - V S L A L T Q Y   |
| DDM1   | : E L C F L L T G G Q L A S Y Q L G V K W L I S L N Q N G L N G - I L | A D Q M G L G K T I Q | T I G L S L Y L G N - G L D G P Y | L V I A I L S T | L S N W E N E I A P T P S I N A I I Y G K N Q D H L R R K - - - - - I M K T I V G P                           |
| SYD    | : E Q S S L V G G K L R E Y Q M N G L R W L V S L N N L N G - I L     | A D E M G L G K T V Q | V I S L I C L M L T K N E R G P F | L V V V S S V   | L A C W O S E I N F M A P S I I I V K C G T D E R R L F K E - - - - - C I V I Q                               |
| PKL    | : D H T E R L G L L P Y Q L G L N F L F S W S K Q T V - I L           | A D E M G L G K T I Q | S I A L L A S L F E E N - - L I P | L V I A I L S T | L N W E E E F A T W A Q M N V V M Y E G T A Q A R A V I - E E F Y L S I D K K I K K K S G Q I S S S S K Q R I |
| AtMOM1 | :                                                                     |                       |                                   |                 |                                                                                                               |
| PtMOM1 | : D L L S A G G S P E F D Y N L D F V N Y L I D Y W L K G E N A V L I | D D Q E Q I T N V I S | F I - - - - L S L S S N A S W P F | L I I T T S A S | L L S W E E E L F R L A F S L M A V V L H G N K I R K S I R K - - - - - L E F Y S E G G C I                   |
| PtMOM2 | : L Q L S A G G S P E F D N N L D F V N Y L L E C W H G E N V V L I   | D D Q E Q I A R V I Y | F I - - - - L S I S S N A T W P F | L I I T T S A A | L L S W E E G L F R L A F S L M A V V L H G N K I R K S I R T - - - - - L E F Y S E G G C I                   |
| OsMOM1 | : Q K L P G F P P G L D K D L S S I N N L D F W I N S D G A I C L     | D D Q E V I R T I L   | F S - - - - M S I L P D V C Q L   | L I V T S A S   | L S L W H A K F N R L A F S I N V V V Y N G K D V E K Q I O P - - - - - L E F Y E N G - L V                   |
| OsMOM2 | : Q K L P D E W P P G F D N D L F S I N Q L L E F W C K S E G A V L V | D D Q E V Y T K T I L | E T - - - - L T V L P D V C Q L   | L I V T T P A S | L S A M E I Q F N L A F F I N V V V Y D G K D T L K L I O P - - - - - L E F Y D N R F C M                     |

I

Ia

*gym-4* (G451E)

|        |                                                           |                 |                                           |                   |                                                                                                                             |
|--------|-----------------------------------------------------------|-----------------|-------------------------------------------|-------------------|-----------------------------------------------------------------------------------------------------------------------------|
| HsCHD3 | : K F V L L T S Y E L I T I Q A - - A L G S I N W A C     | L V V D E A H R | L K N N S K F F F V L N G - Y K I D H K L | L L T G T L O N   | N L E E L F H L L N F L T P E R F N N L E G L E E F A D I S K E D - - - - - Q I K N L L L G H M L                           |
| dMi-2  | : K E N V L L T S Y F L I S M D A A - - C L G S I D A V   | L V V D E A H R | L K S N S K F F F I L N S - Y T I A K L   | L L T G T L O N   | N L E E L F H L L N F L S D A F N L Q A Q G E F A D V S K E E - - - - - Q V K R L L L G H M L                               |
| DDM1   | : K F F I V I T S Y E V A M N A R - - R I L R Y P W K Y   | V V I D E G H R | L K N H C L L L E L K H - L M M N K L     | L L T G T L O N   | N L S E L S L L N F I L P L I T S D E F E S W F D F S E K N N E A T - - - - - E E E E K R A Q V V S L A G I L R P F I L     |
| SYD    | : K F N V L L T T Y E V L M N E D F P L S K I I W E Y     | I I I D E G H R | I K N A S C L N A D L K H - V V S S R L   | L L T G T L O N   | N L E E L A L L N F L L E N I N S S E D F S Q W F N K P F O S N G E S S - A E E A L L S E E N L L I I N L L Q V L R P F V L |
| PKL    | : K E V L L T S Y E M I N L S A - - V L K I K W E C       | M I V D E G H R | L K N K S L S L S L T Q - Y S S N E I     | L L T G T L O N   | N L D E L F M L M F L A G E G S L E E R Q E F K I N O E E - - - - - Q I S L L K M L A P H L L                               |
| AtMOM1 | :                                                         |                 |                                           |                   |                                                                                                                             |
| PtMOM1 | : M F Q I L V T S P E V I I E D L N - - V L E S M W E A   | V I V D E C Q S | S R I F S E F K Q I K M L - - - T A M L   | L L V N G Q L D   | G I T E L L S L L V H O S D - - - - - L N G S E E L V T I N L S P T G - - - - - N L K Q O L S Y I A                         |
| PtMOM2 | : M F Q I L T S P E V I I E D L N - - M L S M W E A       | I I V D E C Q S | S R I F S E F K Q I K L L S - - T A M L   | L L V N G Q L D   | G I T E L L S L L V H O S D - - - - - D G S E C L V I D S S H A T G - - - - - I K E R L S O Y I A                           |
| OsMOM1 | : T R Q V L L S P D A I L E I D I O - - T M E S I V W E A | V M V D C Q S   | L R V S C L E Q L A K L S - - I N F R M   | V L L S F L K E   | S I P E Y I N L L S F L N P E S V I S S S S N G D F T D I G I L A - - - - - I L K E F A R H V A                             |
| OsMOM2 | : M L Q V L L S P D A I L E I E I E - - T I E R I W E A   | V I V D Y Y E N | S - A R K Y F E Q L K K I S - - T D E R M | V L L G S I T K D | N V P E Y M N L L A F L N S E - - - - - D W G Y S D Y V N A D D A L V - - - - - M S N A F E T H H I A                       |

II

III

|        |                                                                                                                                                                                                                                                               |
|--------|---------------------------------------------------------------------------------------------------------------------------------------------------------------------------------------------------------------------------------------------------------------|
| HsCHD3 | : R R L A A - - - D V E K N M P A - K T E L I V V E L S P M O K K Y K Y I L T I N F A L N S R G - - - - - G G N O V S L L N I M M D L R K C C N H P Y L F F V A A M E S P L F S G - A Y E G G A L I K S S G M L M L L O K M L R K L E Q G A - - - - - F V L I |
| dMi-2  | : R R L A T - - - D V L K N M S - K S E I V I V E L S A M O K K F Y K I L T I N Y A L N S K S - - - - - G G G S C S L I N I M M D L K C C N H P Y L F F S A A E A T T A A G G - L Y E I N S L T A A G K L V L L S K M L Q L A Q N E - - - - - F V L I         |
| DDM1   | : R R M - - - - C D V E L S L R K K F I I M A T M I D Q K K E C S L V N N T L E A L G - - - - - E N A I G G Q G K L N N L V I Q L R K N C N H P L L Q C I I G S L Y E F V - - - - - E E I V G C G K F R L L R L L V L E A N N E - - - - - F V L I             |
| SYD    | : R R L A - - - - H K V E N L E P E I E L I R C E A S A Q L L M K M V E D N - - - - - L G S I G N A S R A V I N S V M E L N I C N H P Y L S Q L S E V N N I I K - - - - - E F - L P F I V L C G A L E M L O R M L E M L A T H - - - - - F V L I               |
| PKL    | : R R V K K - - - - D V M K D M P P - K K E L I L A V L S S L O K E Y Y A I F T I N Y Q V L T I K - - - - - G G A Q I S L N N I M M E L R K V C C P Y M L G V E F V I I D A N - - - - - E A F K O L L E S C G K L O L L D K M M V K L E Q G - - - - - F V L I |
| AtMOM1 | : - - - - - E Y W V P V O L S D V Q L E Q C O T L E S K S L S L S S - - - - - L S K I L G - A L E E T L N S V R K T C D H P V M M E A S L Q L L T A N L L L T I L D V I L A S G K L L L K M L T H I K N G L - - - - - K A V V                                 |
| PtMOM1 | : N S P R E - - - - - D P S R E K Y W V P V Q L S M Q L E Q C A I L L S K S L S L C S - - - - - S S R N D F V G A L R E I L S C R K C C D H P Y I M N P S L Q I S L T O R K R A D I L D I G I K A S G M L Q L L G E M L F S I K E N G L - - - - - K A L V     |
| PtMOM2 | : N G C K E - - - - - D S S R L K E Y W V P V O L S N M Q L E Q C A I L L S L L L C S - - - - - S S K N S L A G S L H G I L I S A R K C C D H P Y I M D E S L Q I S L T O S K R A D I L D I G I K A S G K L Q L L A M L E N I K E R G L - - - - - F V L V     |
| OsMOM1 | : F E R I A - - - - - D S S K E L Y W V P A L S R V Q L E M M C Y I L L S N S F A L S - - - - - S R T D S V G A L R E I L V S L R K C C D H P Y L V L Q S L O S S L T A G S L T I L D I G V C A S G K L L L L K M L Q I R N Q G - - - - - F V L I             |
| OsMOM2 | : Y E R K T - - - - - D S S K E L Y W V F S C I S Q P Q L E M M C S I L L S K S S V L S - - - - - E M E T S V G A L R E I L S L K K C C D H P Y I V N E F L S S L S N N S N V T E N I D T V V A S G M L L V L O R M L N E T K K S L - - - - - F V I L         |

IV

*syd-1* (G1152E)

|        |                                                                                                                   |                                   |                                 |                   |                                                             |
|--------|-------------------------------------------------------------------------------------------------------------------|-----------------------------------|---------------------------------|-------------------|-------------------------------------------------------------|
| HsCHD3 | : F S Q M T K M - - - - - L L L E D F L D Y G - - Y K Y E R I G G I T G A L R O A I D R F N A P G A Q Q C         | L L L S T R A G G L G I N L A T A | D T V I I F D S D W N P E N D I | Q A F S R A H R I | G Q A N V M I Y R F V T R A S V E E R I T O V A K R M M L   |
| dMi-2  | : F S Q M T K M - - - - - L D I L E D F L G H Q - - Y K Y E R I G G I T G L R O A I D R F N A P G A Q Q V         | L L L S T R A G G L G I N L A T A | D T V I I Y D S D W N P E N D I | Q A F S R A H R I | G Q A N V M I Y R F V T R S V E E R V T O V A K R M M L     |
| DDM1   | : F S Q M T K L - - - - - L D I M D Y Y F S E S G - - F E V C R I N G S V K L D E R R R Q I D F S D E N S S C S I | L L L S T R A G G L G I N I T A A | D T V I I Y D S D W N P Q M D L | Q A M D C H R I   | G O T K F V I V R L S T A Q S I E T V L K E A F S K L -     |
| SYD    | : F S T M T K L - - - - - L D V M E D Y L T L G - - Y K Y L L L G Q T S G G D G A L I N G E N K S G S F F H I     | L L L S I A G G V G V N I Q A A   | D T V I L F D T D W N P Q V D L | Q A Q A H A R I   | G O K K Y V I V L R F E T V N S V E E O V A S A H K L G T   |
| PKL    | : Y T Q H Q K M - - - - - L L L L E D Y C T H K A - - W Q Y E R I G V G G A R Q I T I D R F N A K S N K R C       | L L L S T R A G G L G I N L A T A | D T V I I Y D S D W N P E A D L | Q A M A R A H R L | G O T N V M I Y R L I N N G T I E R M M Q L I K K M V E     |
| AtMOM1 | : F Y Q A T Q T P E G L L L G N I L E D F V G O R F G K S Y E H G - - - I Y S S K N S A I N N F N K E S Q - C C V | L L L L T R A C S Q T I K L L E A | D A I I L G S S L N P S E D V   | K A V E R I K I   | S C S E R T K I F R L Y S V C T V E E K A L I L A Q N K R Q |
| PtMOM1 | : L F Q S S G G S G K D N I G I L L D D F V Q R F G G S Y E R V E E V L F S R K Q A L E F F N N Q G R E V         | L L L E T R A C S S I K L S S V   | D T V I I A S D W N P M T D I   | S L Q K I T L     | S Q F D Q I N I F R L Y S S C T V E E K V L I I A Q D K T L |
| PtMOM2 | : L F Q S S G G S G K D N V G D I L D D F I R Q R F G C Y E R V D G V L F S R K Q A A L N F N N L O G R F V       | L L L E T R A C S S I K L S S V   | D T V I I A S D W N P E N D I   | A N L Q I T L Y   | S S E Q I N I F R L Y S S C T V E E K V L I V A Q D K T L   |
| OsMOM1 | : V S Q S G G G - A G N P M G D I L L D D F V Q R F G F E S Y E R V E E G L L V P K K Q T A L N M F N K T G R E I | L L I D S R A C V P S I K L S S V | D A I I I C S D W N P I N D L   | V L O R I S I F   | S Q S E C V E I F R L Y S S C T V E E K T L I L A E D H I L |
| OsMOM2 | : L F Q S S K A - G G N M C N I L E D L M H R F G F E S Y E R V E E A V L S R K Q A A I K F N N T N G R E V       | L L I N A C L F L I S S I         | D A I I I G S D W N P I N D L   | A L O K I I I     | S Q F E V S I F R L Y L F T V E E K S L V L A L Q G I V I   |

IV

V

VI
