# Supplementary material for: Divergent Evolution of CHD3 Proteins Resulted in MOM1 Refining Epigenetic Control in Vascular Plants
Source: PubMed Central journal article supplement (PMC2507757; doi:10.1371/journal.pgen.1000165), 2008-08-22

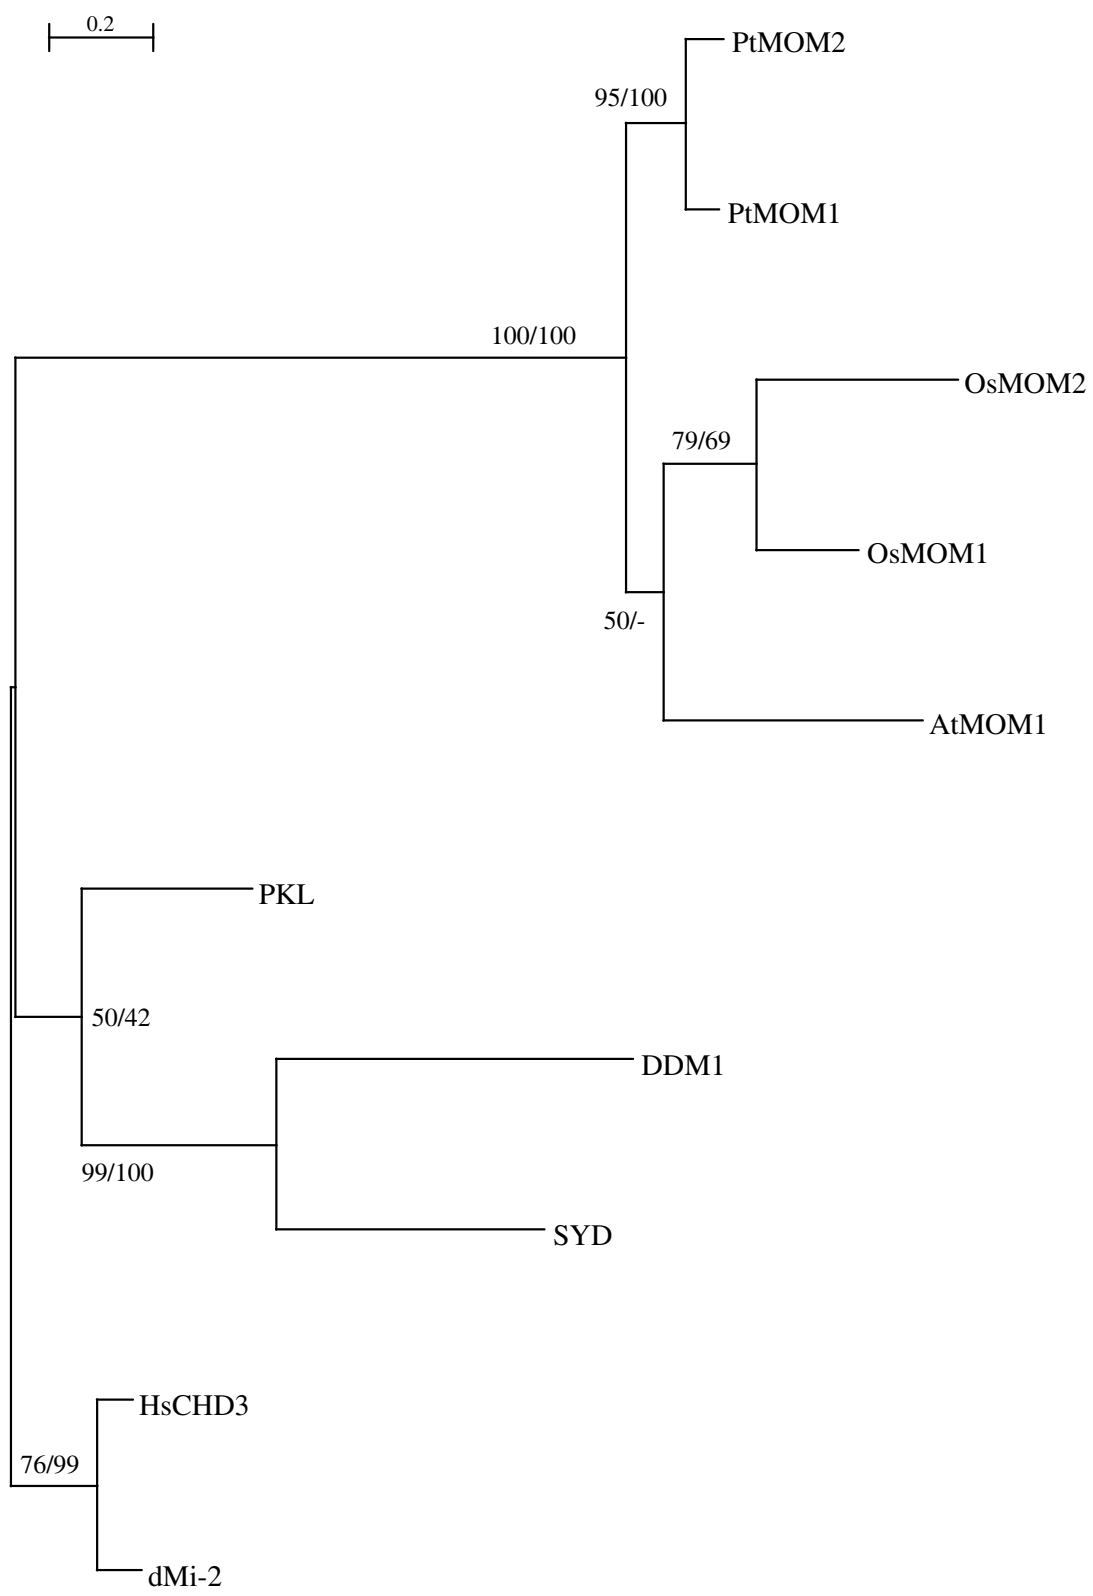

Supplement: pgen.1000165.s006.pdf [file pgen.1000165.s006.pdf]
